# Supplementary material for: Molecular signatures of preeclampsia subtypes determined through integrated weighted gene co-expression network analysis and differential gene expression analysis of placental transcriptomics
Source: Front Cell Dev Biol. 2025 Jul 31;13:1635878. doi: 10.3389/fcell.2025.1635878 (PMC12350358; doi:10.3389/fcell.2025.1635878)
Supplement: Supplementary file 2 [file Table1.xlsx]

## Sheet: Sheet1
GEO Accession	Year	GEO Title	Experiment Type	Publication PMID	Platform	Experiment Type	Sample number	PE subtype	Single/Pooled samples	Sampling Gestation	Placental sampling	RNA isolation	Study Population	Mode of delivery	Main Findings
GSE234729	2023	RNA sequencing identifies human placentalIL3RAas a potential predictor of adverse cardiovascular outcomes in patients with severe preeclampsia	Expression profiling by high throughput sequencing	37949031	GPL24676, Illumina NovaSeq 6000	Bulk RNA-seq	111	severe PE	Single	Delivery	Placental villous tissue	mirVana RNA Isolation Kit (ThermoFisher)	PE 42, Control 67
GSE203507	2023	Molecular subphenotyping using placental transcriptomics in early-onset preeclampsia and fetal growth restriction	Expression profiling by high throughput sequencing	36987911	GPL16791, Illumina HiSeq 2500	Bulk RNA-seq	30	EOPE (< 34 wks GA) with/without FGR	Single	Delivery	Villous tissue (VT), decidua basalis (DB)	TRIzol method	8 EOPE, 7 EOPE+FGR, 5 FGR, 5 C (PTB), 5C (TB)	CS	14 correlated gene modules in our specimens, of which most were significantly correlated with BW and maternal BP.glycolysis/gluconeogenesis metabolic pathway consistently distinguished a subset of EOPE±FGR
GSE149812	2023	Different expression profiles of mRNAs in preeclampsia and normal placenta (mRNA)	Expression profiling by array	NA	Phalanx Human OneArray Ver. 7 Release 1	Microarray	6	EOPE (< 31 wks GA)	Single	Delivery	Placental villous tissue	TRIzol method	3 EOPE, 3 C	CS	NA
GSE186257	2023	Histopathologic and transcriptome profiling identify novel trophoblast lineage-specific defects in preeclampsia	Expression profiling by high throughput sequencing	36853788	GPL24676, Illumina NovaSeq 6000	Bulk RNA-seq	44	PE with Maternal Vascular Malperfusion	Single	Delivery	Placental villous tissue	mirVana RNA Isolation Kit (ThermoFisher)	26 PE + MVM (Maternal Vascular Malperfusion), 18 MVM		PE placentas with MVM pathology show significant enrichment of inflammatory and hypoxia-associated pathways, with reduced cell proliferation. a transcriptomic analysis identified pathways associated with hypoxia, inflammation, and reduced cell proliferation in PE-MVM placentas and further subclassified this group into extravillous trophoblast-high and extravillous trophoblast-low PE
GSE206988	2022	A miRNA signature for early non-invasive diagnosis of pre-eclampsia	Non-coding RNA profiling by high throughput sequencing	36096786	GPL24676, Illumina NovaSeq 6000	Bulk RNA-seq	10	NA	Single	Delivery	Placental villous tissue	RNeasy Purification Kit (Qiagen）	5 PE , 5C	NA	Among the five DEmiRNAs, two miRNAs (miR19a-3p and miR-520f-5p) were found to be up-regulated and three miRNAs (miR-584-5p, miR-196b-5p, and miR1299) were down-regulated in PE placental samples compared with normal placental samples
GSE204835	2022	Placental transcriptome analysis of hypertensive pregnancies identifies distinct gene expression profiles of preeclampsia superimposed on chronic hypertension	Expression profiling by high throughput sequencing	37131171	GPL30173, NextSeq 2000	Bulk RNA-seq	48	preterm/term/severe/superimposed PE	Single	Delivery	formalin-fixed and paraffin-embedded placental sample	RNAstorm™ kit (Cell Data Sciences, Fremont, CA, USA)	12 C; 13 CH; 5 PresPE; 11 TermsPE; 3Pre SI; 4 Term SI	NA	The majority of significant genes were downregulated in term and preterm SI versus normotensive controls (92.1%, N = 128). Conversely, most term and preterm PreE with severe features genes were upregulated compared to the normotensive group (91.8%, N = 97).
GSE137854	2022	Circular RNA microarray expression profile in preeclampsia and natural pregnancy placenta tissues	Non-coding RNA profiling by array	33738906	GPL21825, 074301 Arraystar Human CircRNA microarray V2	Microarray	10	NA	Single	Delivery	Tissue from the maternal surface of the placenta	TRIzol method	5 PE 5 C	CS	273 differentially expressed circRNAs were screened; circVRK1 suppresses trophoblast cell migration, invasion and EMT, by acting as a ceRNA to miR‐221‐3p to regulate PTEN, and further inhibit PI3K/Akt activation.
GSE188313	2022	Diminished trophoblast differentiation in early onset preeclampsia	Expression profiling by RT-PCR	35168169	GPL20702, SABiosciences RT2 Profiler Epithelial-Mesenchymal Transition PCR Array	RT-PCR Array	23	EOPE (< 34 wks GA)	Single	Delivery	Undifferentiated cytotrophoblast (CTB) and differentiated extravillous trophoblast cells (EVT)	miRNeasy Mini Kit (Qiagen）	5 CTB-C (placenta previa controls) 8 EVT-C, 4CTB-EOPE, 6EVT-EOPE	CS	preeclampsia the EMT which mediates CTB differentiation to EVT has been impaired.
GSE190973 Superseries	2021	Whole Transcriptomic analysis of placenta and its released extracellular vesicles in normal and preeclampsia pregnancies: insigths into novel biomarkers and mechanisms of disease	/	10720444									6 EOPE 6 C	NA	differential expression of FLNB, COL17A1, SLC45A4, LEP, HTRA4, PAPP-A2, EBI3, HSD17B1, FSTL3, INHBA, SIGLEC6, and CGB3
GSE190971	2021	Transcriptomic analysis of placenta and its released extracellular vesicles in normal and preeclampsia pregnancies: insigths into novel biomarkers and mechanisms of disease	Expression profiling by high throughput sequencing	10720444	GPL11154, Illumina HiSeq 2000	Bulk RNA-seq	41	NA	Single	Delivery	PlacentaL villous tissue and STB-Evs with different sizes	RNeasy mini kit/miRCURY™ RNA isolation kit for biofluids (EV)	6 EOPE 6 C	NA
GSE190972	2021	SmallRNA analysis of placenta and its released extracellular vesicles in normal and preeclampsia pregnancies: insigths into novel biomarkers and mechanisms of disease	Non-coding RNA profiling by high throughput sequencing	10720444	GPL11154, Illumina HiSeq 2000	Bulk RNA-seq	41	NA	Single	Delivery	PlacentaL villous tissue and STB-Evs with different sizes	RNeasy mini kit/miRCURY™ RNA isolation kit for biofluids (EV)	6 EOPE 6 C	NA
GSE190639	2021	Placental Immune alterations in early-onset preeclampsia and late-onset preeclampsia	Expression profiling by array	34992598	GPL31059, Nanostring Technology	Microarray	32	EOPE (< 34 wks GA), LOPE (≥ 34 wks GA)	Single	Delivery	Placental villous tissue	RNeasy mini kit (Qiagen)	13 EOPE, 6LOPE, 13C	NA	distinct pathophysiological processes in earlyonset and late-onset preeclampsia placentas
GSE155750	2021	Hypoxia induces trophoblast migration and invasion gene pathways, a subset of which are reduced in preeclampsia	Expression profiling by high throughput sequencing	33784241	GPL24676, Illumina NovaSeq 6000	Bulk RNA-seq	6	NA	Single	78 - 96 days of GA	Chorionic villus samples	RNeasy Plus Mini Kit (Qiagen)	2 PE, 2C	NA	396 significant DEGs, with p-value <0.05 and 17 significant DEGs, with FDR p-value < 0.05.
GSE177049	2021	Integrative Analysis of miRNA and gene Expression Profiles of Early-Onset Preeclampsia	Expression profiling by high throughput sequencing/Non-coding RNA profiling by high throughput sequencing	NA	GPL18573, Illumina NextSeq 500; GPL24676,Illumina NovaSeq 6000	Bulk RNA-seq	20	EOPE	Single	Delivery	NA	TRIzol method	5EOPE, 5 C (PTB)	NA	NA
GSE173193	2021	Single cell RNA-sequencing reveals placenta cellular heterogeneity in adverse pregnancy	Expression profiling by high throughput sequencing	36111571; 34025588	GPL24676, Illumina NovaSeq 6000	scRNA-seq	8	severe PE	Single	Delivery	Placental villous tissue	single cell suspensions	2 sPE, 2 GDM, 2 Elderly, 2 C	CS	difference in single-cell level transcriptional profiles between normal and preeclamptic placenta, especially in trophoblast cells. Moreover, we found that the TFs CEBPB and GTF2B in EVTs regulate cell apoptosis and invasion
GSE160888	2020	RNA microarray analysis of human placenta in normal pregnancy and preeclampsia	Expression profiling by array/Non-coding RNA profiling by array	33424915	GPL16956 Agilent-045997 Arraystar human lncRNA microarray V3 (Probe Name Version)	Microarray	8	NA	Single	Delivery	Placental villous tissue	TRIzol method	4 PE (>34wks) 4C		the hypoxia-induced expression of lncRNA-HEIPP mediated by H3K4me3 modification in trophoblast may contribute to the pathogenesis of PE.
GSE143966	2020	Integrated analysis of the transcriptome-wide m6A methylome in preeclampsia and healthy control placentas.	Expression profiling by high throughput sequencing	32983644	GPL20301, Illumina HiSeq 4000	Bulk RNA-seq	16	NA	Single	Delivery	Placental villous tissue	TRIzol method	4 PE (>34wks) 4C	CS	68 up-regulated and 52 down-regulated genes
GSE143953	2020	RNA sequence of preeclampsia and healthy control placentas	Expression profiling by high throughput sequencing	32983644	GPL20301, Illumina HiSeq 4000	Bulk RNA-seq	8	NA	Single	Delivery	Placental tissue from the fetal side	TRIzol method	4 PE (>34wks) 4C
GSE147776	2020	Placental microarray profiling reveals common mRNA and lncRNA expression patterns in Preeclampsia and Intrauterine Growth Restriction	Expression profiling by array	32443673	GPL20844, Agilent-072363 SurePrint G3 Human GE v3 8x60K Microarray	Microarray	28	PE with/withour IUGR, IUGR	Single	Delivery	Full-thickness placental tissue	RNeasy Fibrous Tissue Mini Kit (Qiagen)	7 IUGR, 7 PE, 6PE+IUGR, 8 C (>37 weeks of gestation)	CS
GSE148241	2020	Placental Editome Profiling Reveals Widespread RNA-Editing Dysregulation in Preeclampsia	Expression profiling by high throughput sequencing	32306769	GPL16791, Illumina HiSeq 2500	Bulk RNA-seq_Genome-scale RNA editing profiling	43	early-onset severe PE	Single	Delivery	Placental villous tissue	RNeasy® Plus Universal Mini Kit (Qiagen)	9EOsPE 34 C (term?)	NA	we have systematically profiled RNA editome on the placentae, 9 from patients with early-onset severe preeclampsia (EOSPE) and 32 from normal subjects, and a widespread RNA editing dysregulation in EOSPE has been identified. The mis-edited gene set is enriched with known preeclampsia-associated genes and differentially expressed genes in EOSPE.
GSE114691	2019	Placental transcriptome in pregnancies complicated by Intrauterine growth restriction (IUGR) and preeclampsia (PE)	Expression profiling by high throughput sequencing	31248403	GPL11154, Illumina HiSeq 2000	Bulk RNA-seq	79	EO (< 34 wks GA) PE, PE with FGR, FGR	Single	Delivery	fetal components (chorionic villi)	mirVana RNA isolation kit	20 EOPE, 18 EO-IUGR, 20PE+IUGR, 21 C	NA	6 miRNAs and 22 genes were identified to be differentially expressed in all three patient groups
GSE114349	2019	Placental microRNA expression in pregnancies complicated by Intrauterine growth restriction (IUGR) and preeclampsia (PE)	Non-coding RNA profiling by high throughput sequencing	31248403	GPL11154, Illumina HiSeq 2000	Bulk RNA-seq	79	EO (< 34 wks GA) PE, PE with FGR, FGR	Single	Delivery	fetal components (chorionic villi)	mirVana RNA isolation kit	20 EOPE, 18 EO-IUGR, 20PE+IUGR, 21 C	Mix	6 miRNAs and 22 genes were identified to be differentially expressed in all three patient groups
GSE102897	2019	Competing endogenous RNA expression dataset from placenta tissues of normal human and patients with severe preeclampsia.	Expression profiling by array/Non-coding RNA profiling by array	29643944; 31799347	GPL22120 Agilent-078298 human ceRNA array V1.0 4X180K	Microarray	6	severe PE	Pooled in pairs	Delivery	Placental samples from near the maternal side.	RNAiso Plus (Cat# 9109; TaKaRa)	3sPE 3C	CS	profiling of ceRNAs in placentas of PE patients and revealed the global ceRNA network integration in PE. Moreover, hsa_circ_0036877 can function as a ceRNA and serve as a potential novel blood biomarker for early PE.
GSE66273	2018	Genome-wide analysis of placental gene expression in severe preterm preeclampsia	Expression profiling by array	30135694	GPL4133, Agilent-014850 Whole Human Genome Microarray 4x44K G4112F	Microarray	17	preterm PE with HELLP syndrome	Single	Delivery	Placental villous tissue	RNeasy Fibrous Tissue Mini Kit	6 preterm PE+HELLP,6 preterm PE,5C (preterm)
GSE109832	2018	Regulation of the human placental (pro)renin receptor-prorenin-angiotensin system by microRNAs	Non-coding RNA profiling by array	30060096	GPL18402, Agilent-046064 Unrestricted_Human_miRNA_V19.0_Microarray	Microarray	24	EOPE (< 34 wks GA), LOPE (≥ 34 wks GA)	Single	Early/mid/preterm/term	Placental villous tissue	miRNeasy FFPE kit	4 termC, 4 LOPE, 4 pretermC, 4 EOPE, 4 early GA, 4 mid GA		21 miRNAs with predicted RAS mRNA targets were less abundant in early versus term placentae and nine were more highly expressed.
GSE96985 Superseries	2018	Different expression profiles of lncRNAs, mRNAs and circRNAs in preeclampsia and normal placenta None	/	NA									3 PE 4 C	CS	NA
GSE96983	2018	Different expression profiles of miRNAs in preeclampsia and normal placenta (miRNA)	Non-coding RNA profiling by array	NA	GPL20712 Agilent-070156 Human miRNA [miRNA version]	Microarray	7	NA	Single	Delivery	Basal plate of the placenta	mirVana™ miRNA Isolation Kit	3 PE 4 C	CS
GSE96984	2018	Different expression profiles of lncRNAs, mRNAs and circRNAs in preeclampsia and normal placenta (ceRNA)	Expression profiling by array/Non-coding RNA profiling by array	NA	GPL22120 Agilent-078298 human ceRNA array V1.0 4X180K [Probe Name Version]	Microarray	7	NA	Single	Delivery	Basal plate of the placenta	mirVana™ miRNA Isolation Kit	3 PE 4 C	CS
GSE103542	2017	Dysregulated Placental Micrornas In Early And Late Onset Preeclampsia	Non-coding RNA profiling by array	29277268	GPL23980, miRLink microRNA Arrays v. 16	Microarray	24	EOPE (< 34 wks GA), LOPE (≥ 34 wks GA)	Single	Delivery	Placental tissue from maternal side	TRIzol method	11EOPE, 5LOPE, 8 C		44 miRNAs were dysregulated in PE-complicated placentas,over-expression of miR-518a-5p in PE complicated placentas as compared to controls was verified using qRT-PCR
GSE99007	2017	The difference of placental fibroblast between normal pregnancy and preeclampsia	Expression profiling by array	29253459	GPL21185, Agilent-072363 SurePrint G3 Human GE v3 8x60K Microarray 039494	Microarray	7	NA	single	Delivery	Isolated placenta fibroblast	RNeasy Mini Kit	4PE (2<30W, 2>37W) 3C
GSE97898	2017	Differentially expressed lncRNAs in placentas from patients with late-onset preeclampsia	Non-coding RNA profiling by array	29725373	GPL19640, Agilent-062918 Human lncRNA array V4.0	Microarray	8	LOPE (≥ 34 wks GA)	single	Delivery	Full-thickness placental tissue	mirVana RNA Isolation Kit	4 PE 4C	CS	a total of 163 differentially expressed lncRNAs (FC ≥2.0) were identified.the expression levels of NONHSAT116812 and NONHSAT145880 were significantly lower or higher in plasma from LOPE patients
GSE93839	2017	Transcriptomic Profiling of Trophoblast Subpopulations in Severe Preeclampsia Reveals Novel Aspects of RNA Dysregulation	Expression profiling by array	28347715	GPL16686, Affymetrix Human Gene 2.0 ST Array	Microarray	23	severe PE	single	Delivery	Trophoblast Subpopulations including syncytiotrophoblasts, invasive cytotrophoblasts, endovascular cytotrophoblasts, isolated by laser microdissection	RNeasy Plus Micro kit (Qiagen)	4sPE 4C		Comparison of the trophoblast subtype data within each group (severe preeclampsia or noninfected preterm birth) identified many highly differentially expressed genes.
GSE91189	2016	Severe Preeclampsia is Associated with Alterations in Cytotrophoblasts of the Smooth Chorion	Expression profiling by array	28232601	GPL16686, Affymetrix Human Gene 2.0 ST Array	Microarray	12	severe	single	2nd trimester, Delivery	Smooth chorion cytotrophoblasts	RNeasy Plus Micro kit (Qiagen)	4 sPE, 4 pretermC, 4 mid GA		sPE-related increase in production of PAPPA1, which releases IGF1 from its binding protein. IGF1 enhanced proliferation of smooth chorion CTBs
GSE75010	2015	Placental gene expression profiling for the identification of clinically relevant subclasses of human preeclampsia	Expression profiling by array	27160201	GPL6244, Affymetrix Human Gene 1.0 ST Array	Microarray	157	EOPE (< 34 wks GA), LOPE (≥ 34 wks GA) with/without SGA or Chronic hypertension	single	Delivery	Placental villous tissue	TRIzol method	80 PE, 77C
GSE74341	2015	Gene expression profiling reveal different molecular pattern in G-protein coupled receptor protein signaling pathway between early- and late-onset preeclampsia	Expression profiling by array	27016783	GPL16699, Agilent-039494 SurePrint G3 Human GE v2 8x60K Microarray	Microarray	25	EOPE (< 34 wks GA), LOPE (> 36 wks GA)	single	Delivery	Placental villous tissue	RNAiso Plus (Takara)	7EOPE, 8 LOPE, 5preterm C, 5 termC		Unsupervised cluster analysis revealed that the molecular mechanism of early-onset PE is different from late-onset PE,G-protein coupled receptors may contribute to the mechanism of early-onset PE.
GSE60438	2015	Transcriptome profiling of deciduas from pre-eclamptic and normotensive pregnancies	Expression profiling by array	26010865	GPL6884, Illumina HumanWG-6 v3.0 expression beadchip; GPL10558, Illumina HumanHT-12 V4.0 expression beadchip	Microarray	125	NA	single	Delivery	Decidua basalis	RNeasy Midi kits (Qiagen)	60 PE, 65 C		Major common regulators/targets of these susceptibility genes identified were AGT, IFNG, IL6, INHBA, SERPINE1, TGFB1 and VEGFA.
GSE69452	2015	Global analysis of circulating and placental microRNA signatures and preeclampsia development	Non-coding RNA profiling by high throughput sequencing	NA	GPL10999, Illumina Genome Analyzer IIx	Bulk RNA-seq	14	NA	single	Delivery	Placental biopsy	mirVanaTM miRNA Isolation Kit (Ambion)	7 PE 7 C
GSE54618	2014	Microarray analysis of human pre-eclamptic placenta	Expression profiling by array	25552189	GPL10558, Illumina HumanHT-12 V4.0 expression beadchip	Microarray	24	PE with/without HELLP syndrome	single	Delivery	Placental biopsies from maternal side	MagnaPure LC Total nucleic acid isolation kit (Roche Diagnostics)	7 PE+HELLP, 5PE, 12C		Microarray analysis of 20 placenta tissues identified 158 genes co-regulating with GBA expression and gene enrichment analysis highlights lysosomal function.
GSE47187	2013	Analysis of differentially expressed genes in placental tissues of Pre-eclampsia Using microarray combined with Connectivity Map database	Expression profiling by array	24125805	GPL14550, Agilent-028004 SurePrint G3 Human GE 8x60K Microarray	Microarray	5	severe PE	single	Delivery	Placental biopsies from central cotyledons close to the umbilical cord	TRIzol method	5 PE 5C		A total of 224 transcripts were significantly differentially expressed (>2-fold change and q value < 0.05, SAM software)
GSE50783	2013	LncRNAs Expression in Preeclampsia Placenta Reveals the Potential Role of LncRNAs Contributing to Preeclampsia Pathogenesis	Non-coding RNA profiling by array	24312300	GPL15314, Arraystar Human LncRNA microarray V2.0 (Agilent-033010 Probe Name version)	Microarray	11	NA	single	Delivery	Placenta tissues in the middle of maternal placenta	TRIzol method	6PE, 5C		738 lncRNAs that were differentially expressed (≥1.5-fold-change) among preeclampsia placentas compared with controls.
GSE44711	2013	Gene expression in Early-Onset Preeclampsia Placentas and Controls	Expression profiling by array	23770704	GPL10558, Illumina HumanHT-12 V4.0 expression beadchip	Microarray	16	EOPE (< 34 wks GA)	single	Delivery	Placental villous tissue	RNeasy kit (Qiagen)	8 EOPE 8C
GSE43942	2013	Gene expression profiling for placentas from pre-eclamptic and normal pregnancies	Expression profiling by array	23544093	GPL10191, NimbleGen Homo sapiens HG18 090828 opt expr HX12 (12x135k)	Microarray	12	NA	Single	Delivery	Placental fragment	mirVana™ miRNA Isolation Kit (Ambion)	5 PE, 7 C	CS	251 DEGs (137 up, 114 down)
GSE35574	2012	Differentially expressed microRNAs revealed by molecular signatures of Preeclampsia and IUGR in human placenta	Expression profiling by array	23639576	GPL6102, Illumina human-6 v2.0 expression beadchip	Microarray	94	PE, IUGR	Single	Delivery	Placenta tissue from maternal side	Totally RNA kit (Ambion)	19 PE, 35IUGR, 40 C	Mix	128 DEGs
GSE30186	2011	Genome-wide analysis of gene expression in placentas derived from patients with preeclampsia	Expression profiling by array	22702245	GPL10558, Illumina HumanHT-12 V4.0 expression beadchip	Microarray	12	NA	Single	Delivery	Placental tissue from the maternal side	TRIzol method	6 PE, 6 C	CS	939 DEGs (483up, 456down)
GSE15789	2011	Differential expression of microRNAs in the placentae of Chinese patients with severe pre-eclampsia	Non-coding RNA profiling by array	19642860	GPL8469, Capitalbio mammal microRNA V3.0	Microarray	8	severe PE	Single	Delivery	Placental chorionic tissue	TRIzol method	4 sPE 4 C	CS	We found the following miRNAs were significantly increased in placenta from women with severe PE: miR-16, miR-29b, miR-195, miR-26b, miR-181a, miR-335 and miR-222.
GSE22526	2011	Gene expression profiling of placenta from women with early- and late-onset preeclampsia reveals differences in angiogenesis	Expression profiling by array	22013081	GPL10579, GynObsLU Human 800 PE-associated cDNA	Microarray	15	EOPE (< 32 wks GA), LOPE (> 36 wks GA)	Single	Delivery	Placental tissue from the central part of each placenta	TRIzol method	8 EOPE (24-32wks); 7 LOPE (36-41 wks) --- no control	Mix	196 DEGs in LOPE
GSE25906	2010	Transcriptional Profiling of Human Placentas from Pregnancies Complicated by Preeclampsia Reveals Disregulation of Sialic Acid Acetylesterase and Immune Signaling Pathways	Expression profiling by array	21183218	GPL6102, Illumina human-6 v2.0 expression beadchip	Microarray	60	NA	Single	Delivery	Placental villous tissue	Totally RNA kit (Ambion)	23 PE, 37 C withGA	NA	128 DEGs
GSE24129	2010	Gene expression profiling for placentas from pre-eclamptic, unexplained FGR and normal pregnancies.	Expression profiling by array	21810232	GPL6244, Affymetrix Human Gene 1.0 ST Array	Microarray	24	severe PE, IUGR	Single	Delivery	Placental villous tissue	RNeasy mini-kit (Qiagen)	8 PE, 8 FGR, 8 C	CS	245 DEGs
GSE14722	2009	Severe Preeclampsia-Related Changes in Gene Expression at the Maternal-Fetal Interface Include Siglec-6 and Pappalysin-2	Expression profiling by array	18818296	GPL96, Affymetrix Human Genome U133A Array; GPL97, Affymetrix Human Genome U133B Array	Microarray	46	Preterm severe PE	Single	Delivery	Basal plate biopsy	TRIzol method	12 sPE(24-36); 11 C (24-26 PTB)		55 DEGs
GSE12767	2008	Chorionic villus sampling (CVS) microarray in preeclampsia	Expression profiling by array	19027158	GPL570, Affymetrix Human Genome U133 Plus 2.0 Array	Microarray	12	NA	Single	1st trimester	Chorionic villus sampling (CVS)	NA	4 PE (All LOPE from Table1) 8 C		36 DEGs
GSE10588	2008	Placental gene expression in severe preeclampsia.	Expression profiling by array	19249095	GPL2986, ABI Human Genome Survey Microarray Version 2	Microarray	43	severe PE	Single	Delivery	Placenta tissue	MagNa Pure Compact RNA Isolation Kit (Roche Applied Science)	17 sPE 26 C	Mix	295 DEGs (213up 82down)
GSE6573	2007	Dysregulation of the circulating and tissue-based renin-angiotensin system in preeclampsia	Expression profiling by array	17261642	GPL570, Affymetrix Human Genome U133 Plus 2.0 Array	Microarray	6	NA	Pooled	Delivery	placenta biopsies, decidual tissue, fat tissue	RNeasy mini kit (Qiagen)	10 PE 10 C	CS	10 DEGs
GSE4707	2006	Microarray Analysis of Differentially Expressed Genes in Placental Tissue of Severe Preeclampsia	Expression profiling by array	16860862	GPL1708, Agilent-012391 Whole Human Genome Oligo Microarray G4112A	Microarray	14	onset & severe	Single	Delivery	Placental villous tissue	RNeasy mini kit (Qiagen)	5 EOsPE (<31wks); 5 LOsPE (>31wks); 4 C (Unknown)	CS	137 DEGs (70up 67down)
